# Supplementary material for: Cannabidiol Inhibits the Proliferation and Invasiveness of Prostate Cancer Cells
Source: PubMed Central journal article supplement (PMC10521019; doi:10.1021/acs.jnatprod.3c00363), 2023-09-13
Supplement: np3c00363_si_001.pdf [file np3c00363_si_001.pdf]

# Supporting Information

## Cannabidiol Inhibits the Proliferation and Invasiveness of Prostate Cancer

### Cells

Eve O'Reilly,<sup>§,†</sup> Karima Khalifa,<sup>§,†</sup> Joanne Cosgrave,<sup>§,†</sup> Haleema Azam,<sup>†,‡</sup> Maria Prencipe,<sup>†,‡</sup> Jeremy C. Simpson,<sup>§</sup> William M. Gallagher,<sup>†,‡</sup> Antoinette S. Perry<sup>§,†\*</sup>

<sup>§</sup>UCD School of Biology and Environmental Science, University College Dublin, Ireland, <sup>†</sup>Cancer Biology and Therapeutics Laboratory, Conway Institute of Biomolecular and Biomedical Research, University College Dublin, Ireland, <sup>‡</sup>UCD School of Biomolecular and Biomedical Science, University College Dublin, Ireland

# Table of Contents

## Supplementary Figures

|                                                                                                 |          |
|-------------------------------------------------------------------------------------------------|----------|
| <b>Figure S1.</b> CBD does not affect nucleus area or circularity in prostate cancer cells..... | <b>3</b> |
| <b>Figure S2.</b> 72h CBD treatment does not induce apoptosis in prostate cancer cells .....    | <b>4</b> |
| <b>Figure S3.</b> 48h CBD treatment does not induce apoptosis in prostate cancer cells .....    | <b>5</b> |
| <b>Figure S4.</b> CBD does not alter CDK7 expression in prostate cancer cells.....              | <b>6</b> |
| <b>Figure S5.</b> CBD does not alter secretion of MMP-1, MMP-3, or MMP-9 by PC-3 cells .....    | <b>7</b> |

**Figure S1. CBD does not affect nucleus area or circularity in prostate cancer cells**

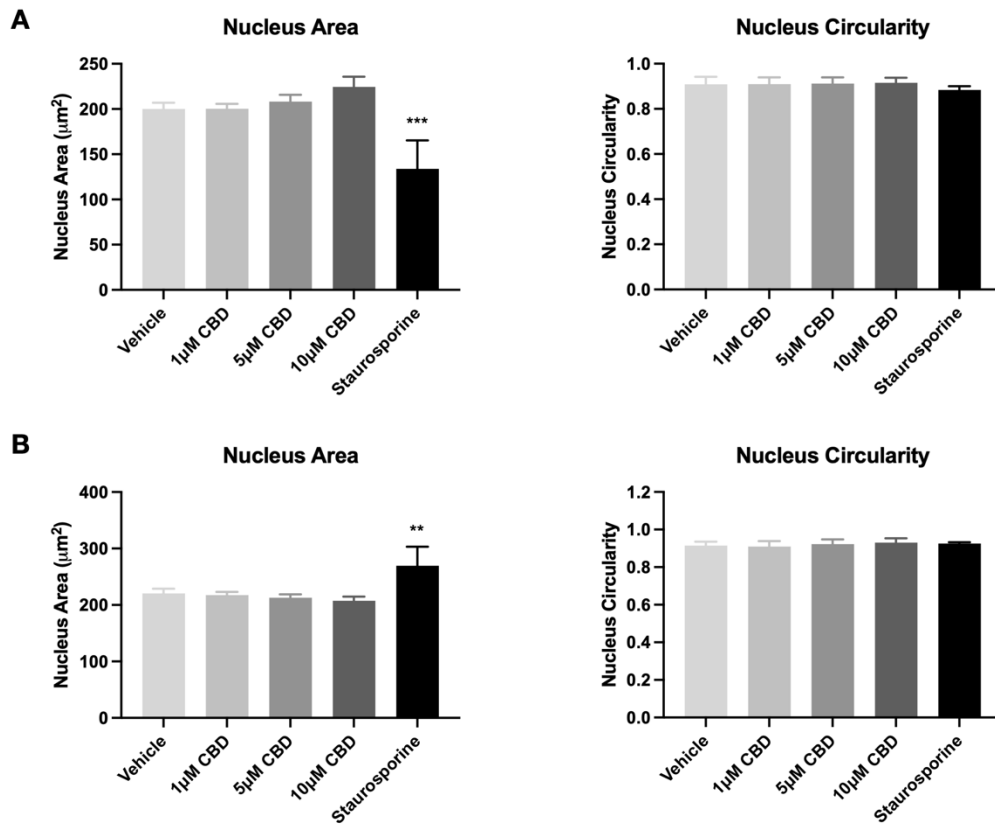

**Supplementary Figure S1. CBD does not affect nucleus area or circularity in prostate cancer cells.** (A) DU145 cells were treated with CBD (1µM, 5µM, 10µM) for 72h. Staurosporine was used as a positive control. Nucleus area and circularity were assessed by high-content fluorescence microscopy using Hoechst staining. (B) PC-3 cells were treated with CBD (1µM, 5µM, 10µM) or staurosporine for 72h. Nucleus area and circularity were assessed using high-content fluorescence microscopy. Data are represented as mean ± SD calculated from at least three independent experiments. \* $p < 0.05$  \*\* $p < 0.01$  \*\*\* $p < 0.001$  compared to the vehicle control for that cell line.

**Figure S2. 72h CBD treatment does not induce apoptosis in prostate cancer cells**

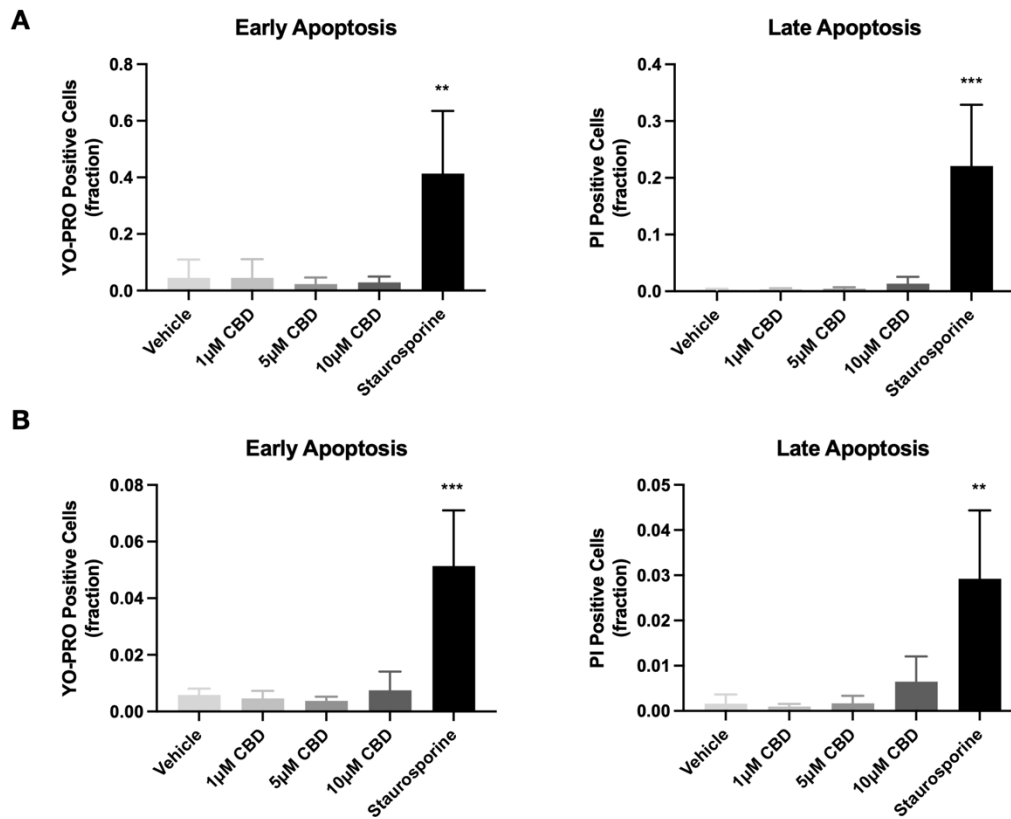

**Supplementary Figure S2. 72h CBD treatment does not induce apoptosis in prostate cancer cells.** (A) DU145 cells were treated with CBD (1µM, 5µM, 10µM) for 72h. Staurosporine was used as a positive control. Fractions of early apoptotic and late apoptotic cells were assessed by high-content fluorescence microscopy using YO-PRO and PI staining. (B) PC-3 cells were treated with CBD (1µM, 5µM, 10µM) or staurosporine for 72h. Fractions of apoptotic cells were assessed using high-content fluorescence microscopy. Data are represented as mean ± SD calculated from at least three independent experiments. \* $p < 0.05$  \*\* $p < 0.01$  \*\*\* $p < 0.001$  compared to the vehicle control for that cell line.

### Figure S3. 48h CBD treatment does not induce apoptosis in prostate cancer cells

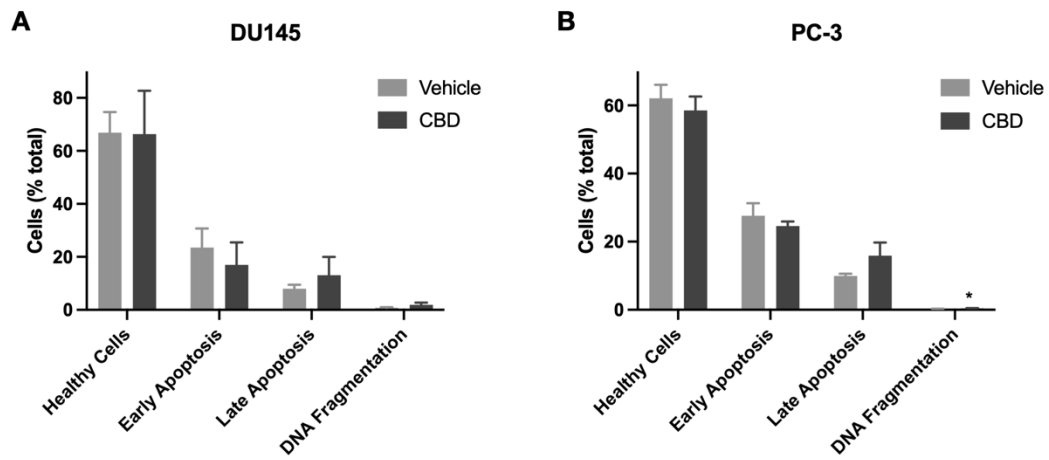

**Supplementary Figure S3. 48h CBD treatment does not induce apoptosis in prostate cancer cells.** (A) DU145 cells were treated with an  $IC_{50}$  dose of CBD for 48h. Fractions of early apoptotic, late apoptotic, and healthy cells were assessed by flow cytometry using YO-PRO and PI staining. (B) PC-3 cells were treated with an  $IC_{50}$  dose of CBD for 48h. Fractions of apoptotic and healthy cells were assessed using flow cytometry. Data are represented as mean  $\pm$  SD calculated from at least three independent experiments. \* $p < 0.05$  compared to the vehicle control for that cell line.

**Figure S4. CBD does not alter CDK7 expression in prostate cancer cells**

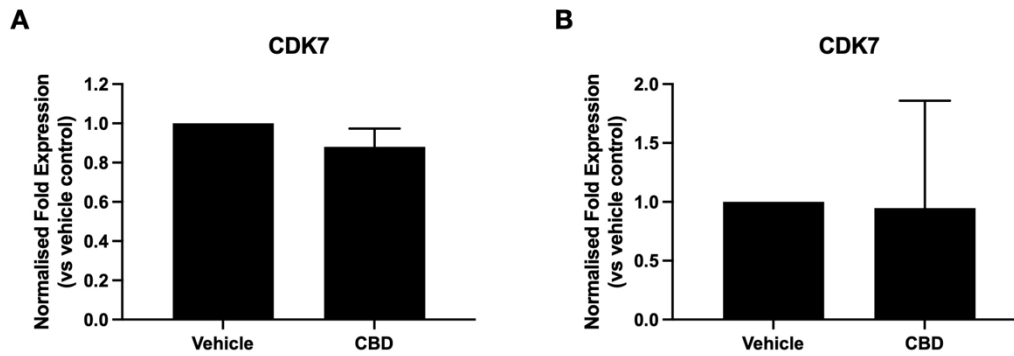

**Supplementary Figure S4. CBD does not alter CDK7 expression in prostate cancer cells.** (A) DU145 cells were treated with an  $IC_{50}$  dose of CBD for 48h. CDK7 expression was measured using Western blotting. (B) PC-3 cells were treated with an  $IC_{50}$  dose of CBD for 48h. CDK7 expression was measured using Western blotting. Data are represented as mean  $\pm$  SD calculated from at least three independent experiments. \* $p < 0.05$  compared to the vehicle control for that cell line.

**Figure S5. CBD does not alter secretion of MMP-1, MMP-3, or MMP-9 by PC-3 cells**

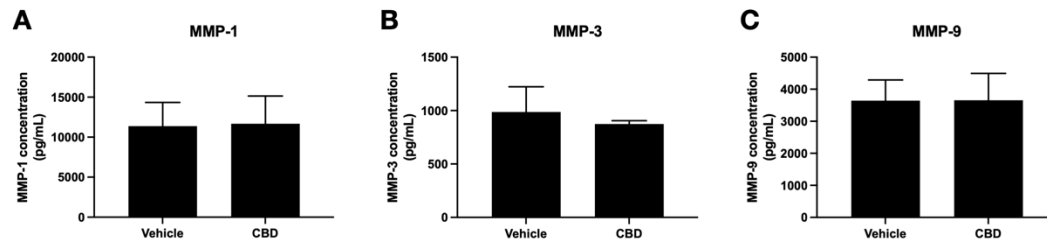

**Supplementary Figure S5. CBD does not alter secretion of MMP-1, MMP-3, or MMP-9 by PC-3 cells.** PC-3 cells were treated with a non-cytotoxic dose of CBD for 48h. (A) MMP-1 secretion was measured using ELISA. (B) MMP-3 secretion was measured using ELISA. (C) MMP-9 secretion was measured using ELISA. Data are represented as mean  $\pm$  SD calculated from at least three independent experiments. \* $p < 0.05$  compared to the vehicle control.
